# Supplementary material
Source: PubMed Central journal article supplement (PMC3133626)
Supplement: NIHMS297151-supplement-supplement_1.pdf [file NIHMS297151-supplement-supplement_1.pdf]

**Supplementary Material**

Supplementary Table 1. Prevalence of Each Reason for Alcohol Use among All Alcohol Users and Consistent Alcohol Users

| Reason                          | All Alcohol Users |      |      |      |      |      |      | Consistent Alcohol Users |      |      |      |      |      |      |
|---------------------------------|-------------------|------|------|------|------|------|------|--------------------------|------|------|------|------|------|------|
|                                 | Age               |      |      |      |      |      |      | Age                      |      |      |      |      |      |      |
|                                 | 18                | 19.5 | 21.5 | 23.5 | 25.5 | 27.5 | 29.5 | 18                       | 19.5 | 21.5 | 23.5 | 25.5 | 27.5 | 29.5 |
| Get High                        | .45               | .47  | .44  | .38  | .36  | .64  | .32  | .51                      | .55  | .51  | .49  | .43  | .39  | .38  |
| Have a Good Time                | .73               | .80  | .77  | .74  | .69  | .67  | .63  | .76                      | .82  | .79  | .77  | .72  | .69  | .65  |
| Fit In                          | .10               | .09  | .06  | .05  | .04  | .04  | .03  | .12                      | .09  | .06  | .04  | .03  | .03  | .03  |
| Boredom                         | .23               | .20  | .15  | .11  | .09  | .07  | .06  | .22                      | .20  | .14  | .10  | .08  | .06  | .06  |
| Relax                           | .41               | .51  | .60  | .63  | .67  | .67  | .69  | .42                      | .56  | .64  | .68  | .71  | .71  | .73  |
| Get Away                        | .21               | .19  | .17  | .15  | .13  | .12  | .10  | .20                      | .19  | .08  | .15  | .13  | .12  | .11  |
| Anger/Frustration               | .17               | .16  | .14  | .12  | .10  | .08  | .08  | .17                      | .15  | .14  | .12  | .09  | .08  | .09  |
| Get Through the Day             | .02               | .01  | .01  | .01  | .01  | .01  | .01  | .01                      | .01  | .01  | .01  | .00  | .01  | .01  |
| Hooked                          | .01               | .01  | .01  | .01  | .01  | .01  | .01  | .01                      | .00  | .01  | .01  | .01  | .01  | .01  |
| Increase the Effect Other Drugs | .06               | .04  | .04  | .02  | .02  | .01  | .02  | .05                      | .04  | .04  | .03  | .03  | .02  | .02  |
| Decrease the Effect Other Drugs | .01               | .01  | .01  | .01  | .01  | .01  | .01  | .01                      | .00  | .01  | .01  | .01  | .01  | .00  |
| Seek Insight                    | .04               | .03  | .02  | .02  | .01  | .01  | .01  | .04                      | .03  | .02  | .02  | .01  | .01  | .01  |
| Sleep                           | .06               | .07  | .09  | .09  | .10  | .10  | .09  | .06                      | .08  | .11  | .10  | .11  | .10  | .10  |
| Tastes Good                     | .46               | .50  | .55  | .59  | .60  | .63  | .63  | .52                      | .59  | .64  | .66  | .67  | .69  | .68  |

Note. Experiment was only asked as a reason for alcohol use at age 18, and therefore is not included in the analyses.

Supplementary Table 2. Prevalence of Each Reason for Marijuana Use among All Marijuana Users and Consistent Marijuana Users

| Reason                          | All Marijuana Users |      |      |      |      |      |      | Consistent Marijuana Users |      |      |      |      |      |      |
|---------------------------------|---------------------|------|------|------|------|------|------|----------------------------|------|------|------|------|------|------|
|                                 | Age                 |      |      |      |      |      |      | Age                        |      |      |      |      |      |      |
|                                 | 18                  | 19.5 | 21.5 | 23.5 | 25.5 | 27.5 | 29.5 | 18                         | 19.5 | 21.5 | 23.5 | 25.5 | 27.5 | 29.5 |
| Experiment                      | .65                 | .57  | .42  | .33  | .25  | .22  | .22  | .56                        | .42  | .23  | .14  | .13  | .11  | .15  |
| Get High                        | .76                 | .76  | .76  | .77  | .79  | .79  | .82  | .86                        | .93  | .88  | .88  | .91  | .92  | .90  |
| Have a Good Time                | .66                 | .66  | .63  | .60  | .57  | .52  | .52  | .72                        | .73  | .72  | .62  | .61  | .53  | .57  |
| Fit In                          | .11                 | .10  | .08  | .07  | .06  | .04  | .05  | .10                        | .07  | .06  | .06  | .03  | .03  | .05  |
| Boredom                         | .28                 | .23  | .22  | .18  | .15  | .14  | .11  | .39                        | .37  | .31  | .26  | .22  | .17  | .16  |
| Relax                           | .48                 | .49  | .55  | .59  | .63  | .64  | .65  | .59                        | .75  | .77  | .80  | .79  | .78  | .76  |
| Get Away                        | .22                 | .18  | .16  | .16  | .14  | .14  | .13  | .20                        | .25  | .24  | .24  | .16  | .18  | .15  |
| Anger/Frustration               | .16                 | .12  | .11  | .11  | .10  | .09  | .11  | .19                        | .19  | .16  | .15  | .12  | .11  | .12  |
| Get Through the Day             | .08                 | .05  | .04  | .04  | .04  | .04  | .04  | .11                        | .08  | .09  | .07  | .03  | .04  | .05  |
| Hooked                          | .03                 | .02  | .02  | .02  | .02  | .02  | .02  | .04                        | .05  | .05  | .05  | .05  | .02  | .03  |
| Increase the Effect Other Drugs | .14                 | .11  | .11  | .10  | .08  | .07  | .08  | .21                        | .17  | .18  | .17  | .16  | .10  | .12  |
| Decrease the Effect Other Drugs | .03                 | .03  | .03  | .04  | .03  | .03  | .04  | .03                        | .03  | .06  | .05  | .05  | .03  | .06  |
| Seek Insight                    | .17                 | .14  | .13  | .13  | .13  | .12  | .10  | .25                        | .27  | .24  | .18  | .13  | .13  | .12  |

Note. To sleep and Tastes Good were reasons that were not asked for marijuana use and are therefore not included in the table.
